# Supplementary material
Source: PubMed Central journal article supplement (PMC5321819)
Supplement: NIHMS840357-supplement-1.pdf [file NIHMS840357-supplement-1.pdf]

Supplemental Figure 1

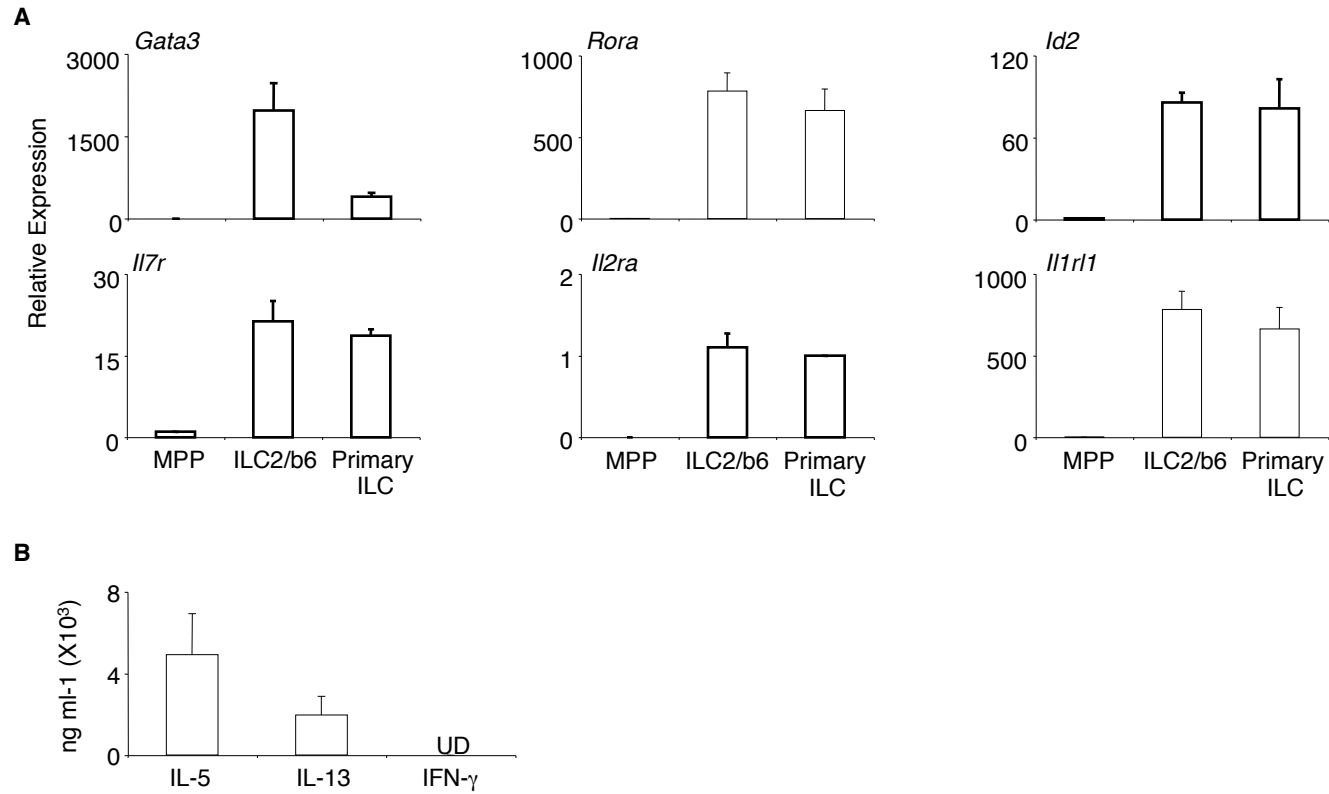

Figure S1: **Validation of ILC2/b6 line.** An immortalized ILC2 cell line, named ILC2/b6, was established with small intestinal lamina propria ILC2 by spontaneous mutation and selection. Cells were maintained with 10 ng/ml IL-2, IL-7 and IL-33. (A) The expression of the indicated genes by ILC2/b6 line was compared with those of bone marrow multipotent progenitors and freshly isolated lung ILC2. (B) The production of cytokines by ILC2/b6 culture was examined by ELISA. Data are from three independent experiments. UD: undetected.

Supplemental Figure 2

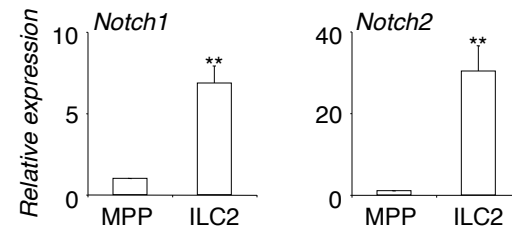

Figure S2: **Mature natural ILC2 (nILC2) express both Notch1 and Notch2.** Lung ILC2 and control bone marrow (BM) multipotent progenitors (MPP) of naïve mice were purified by flow cytometry cell sorting. The expression of *Notch1* and *Notch2* mRNA was examined by QPCR. Data are from three independent experiments.
